# Supplementary material for: Plasma Acylcarnitines during Pregnancy and Neonatal Anthropometry: A Longitudinal Study in a Multiracial Cohort
Source: MDPI journal article supplement (doi:10.3390/metabo11120885), 2021-12-17
Supplement: s1 [file s1]

Supplementary Figure S1. Acylcarnitine trajectory across gestational weeks<sup>a,b</sup>

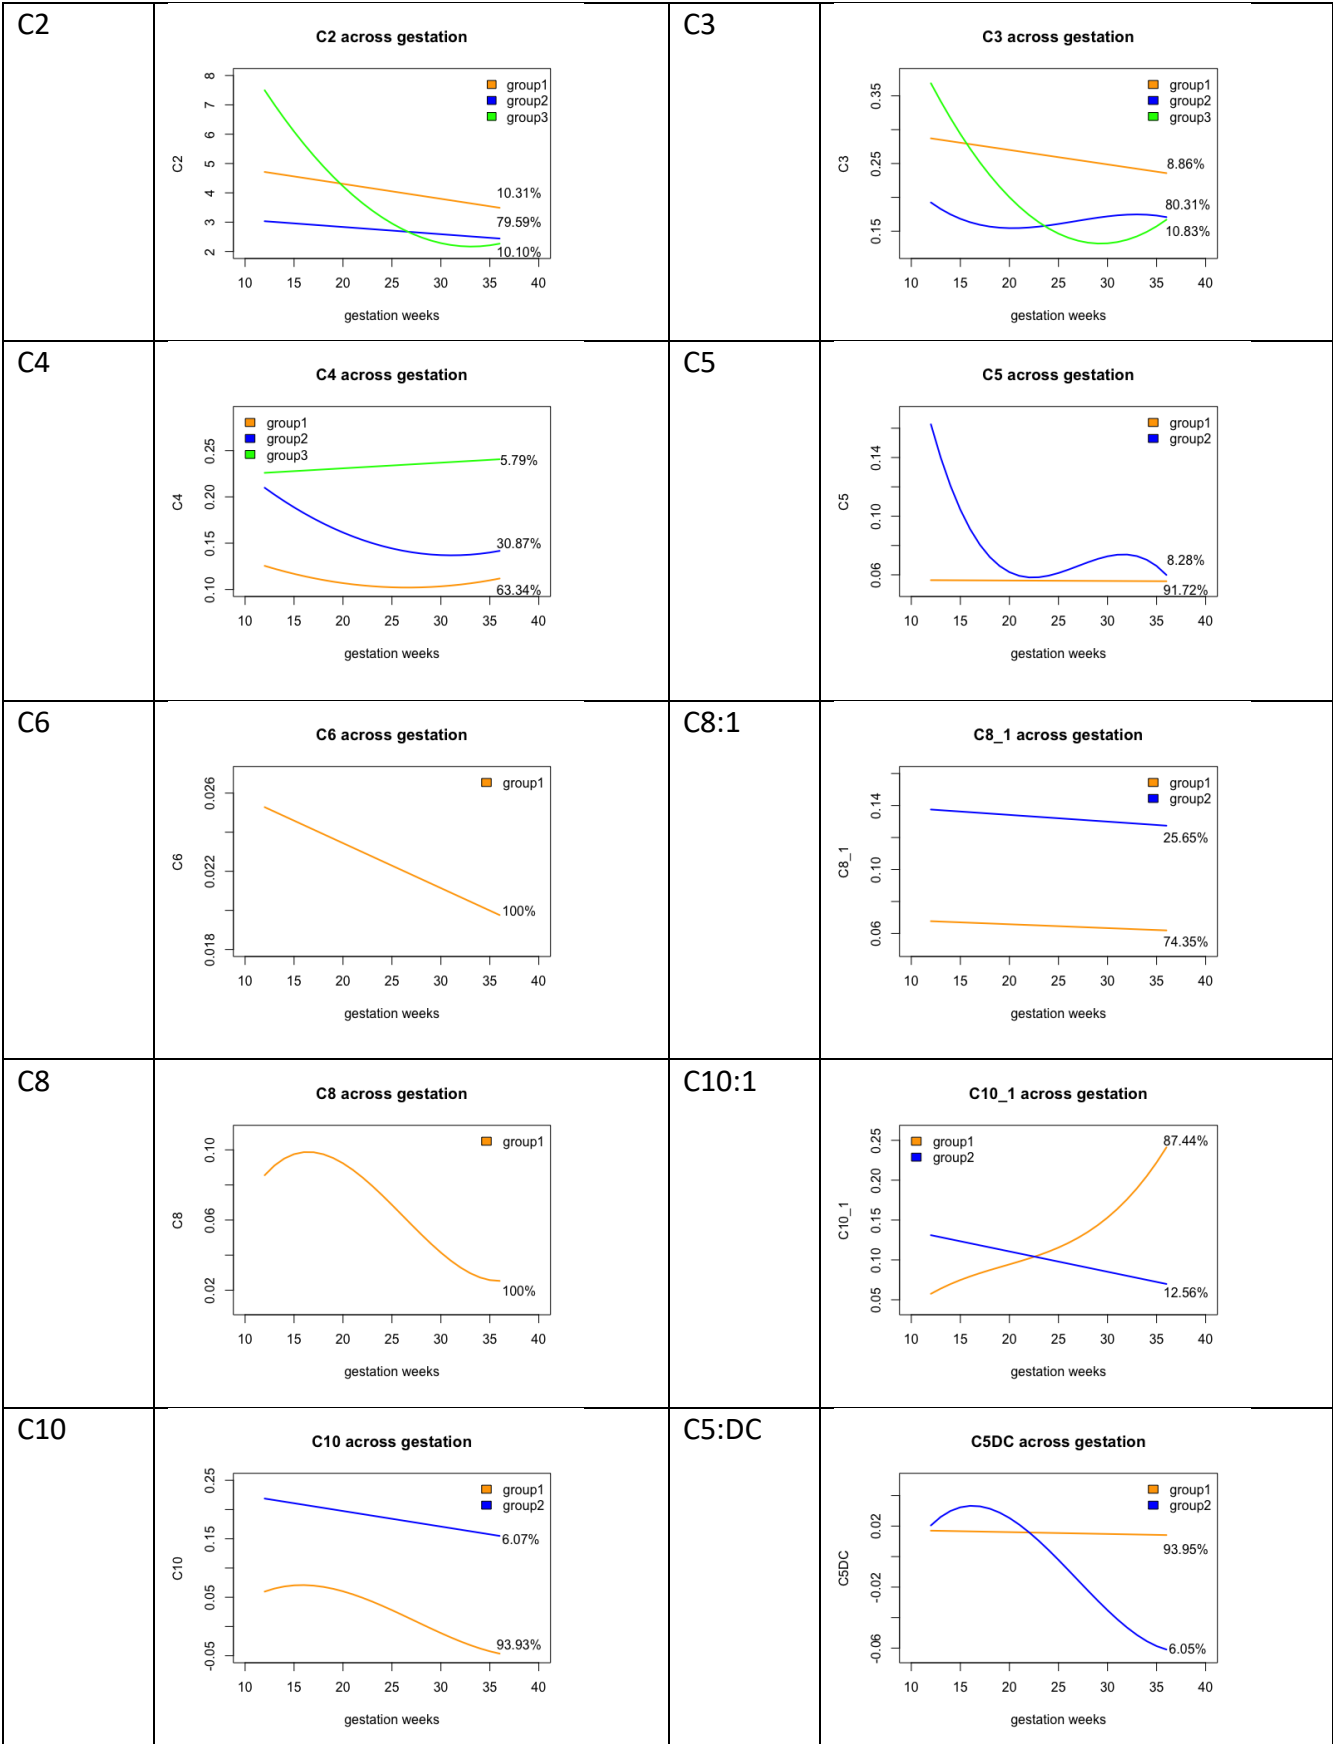

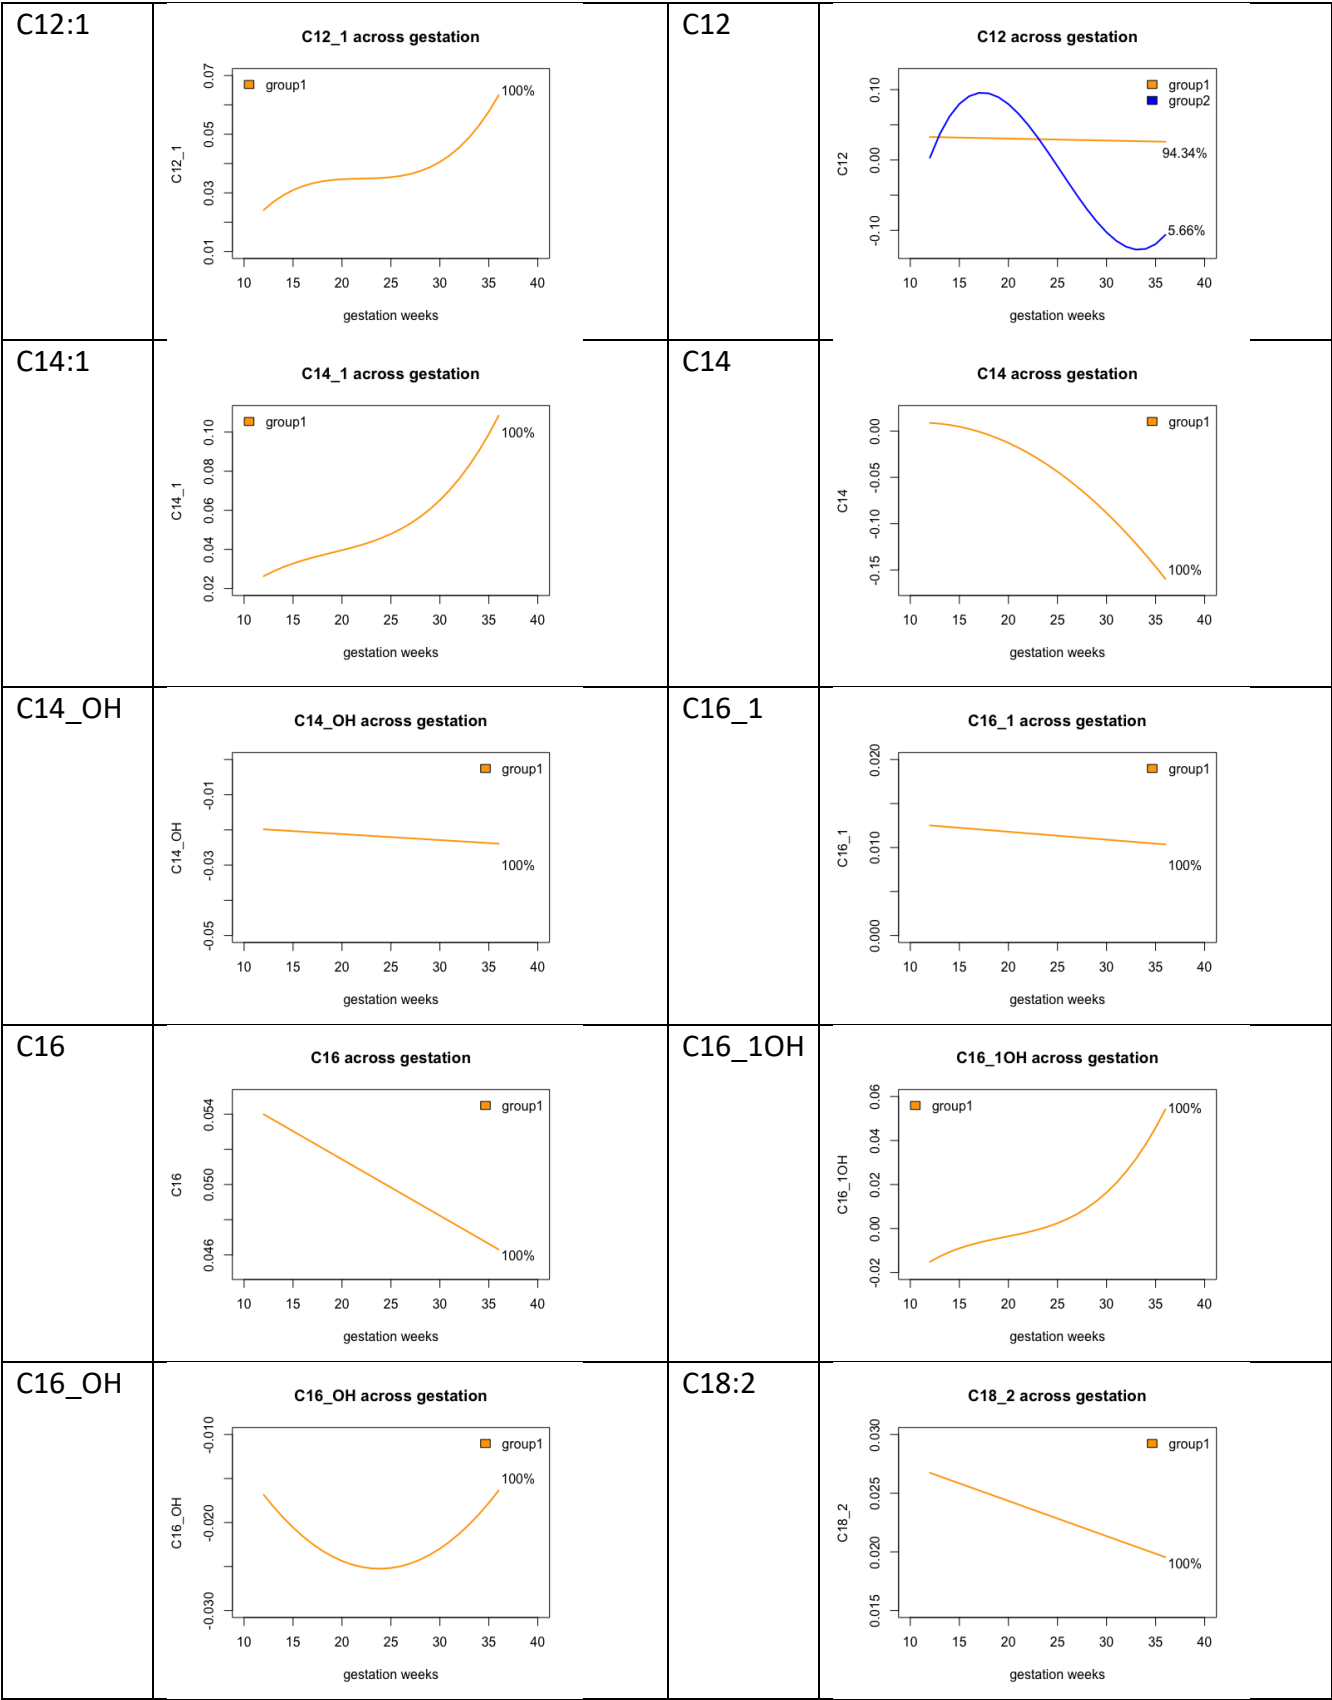

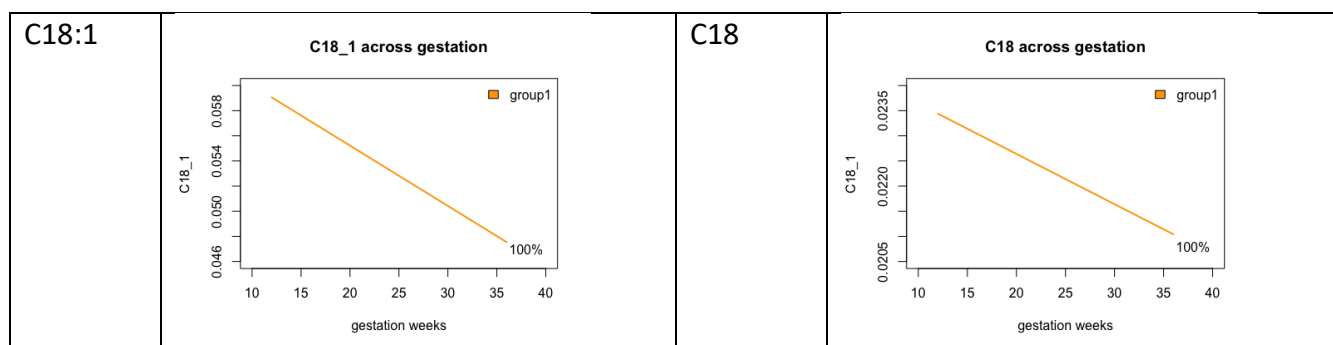

<sup>a</sup> Trajectories were identified based on a weighted latent class model. We compared model fit for each biomarker based on 1–4 trajectory groups and fit linear, quadratic, and cubic models. Final models were selected based on Jeffreys’s scale. Final selected models had  $\geq 5\%$  of the data in each identified group; <sup>b</sup> Group 1 shown in orange; Group 2 shown in blue; and Group 3 shown in green. Percentages represent the proportion of the data estimated to make up each group.

Supplementary Figure S2: Joint trajectory of acylcarnitine across gestational week

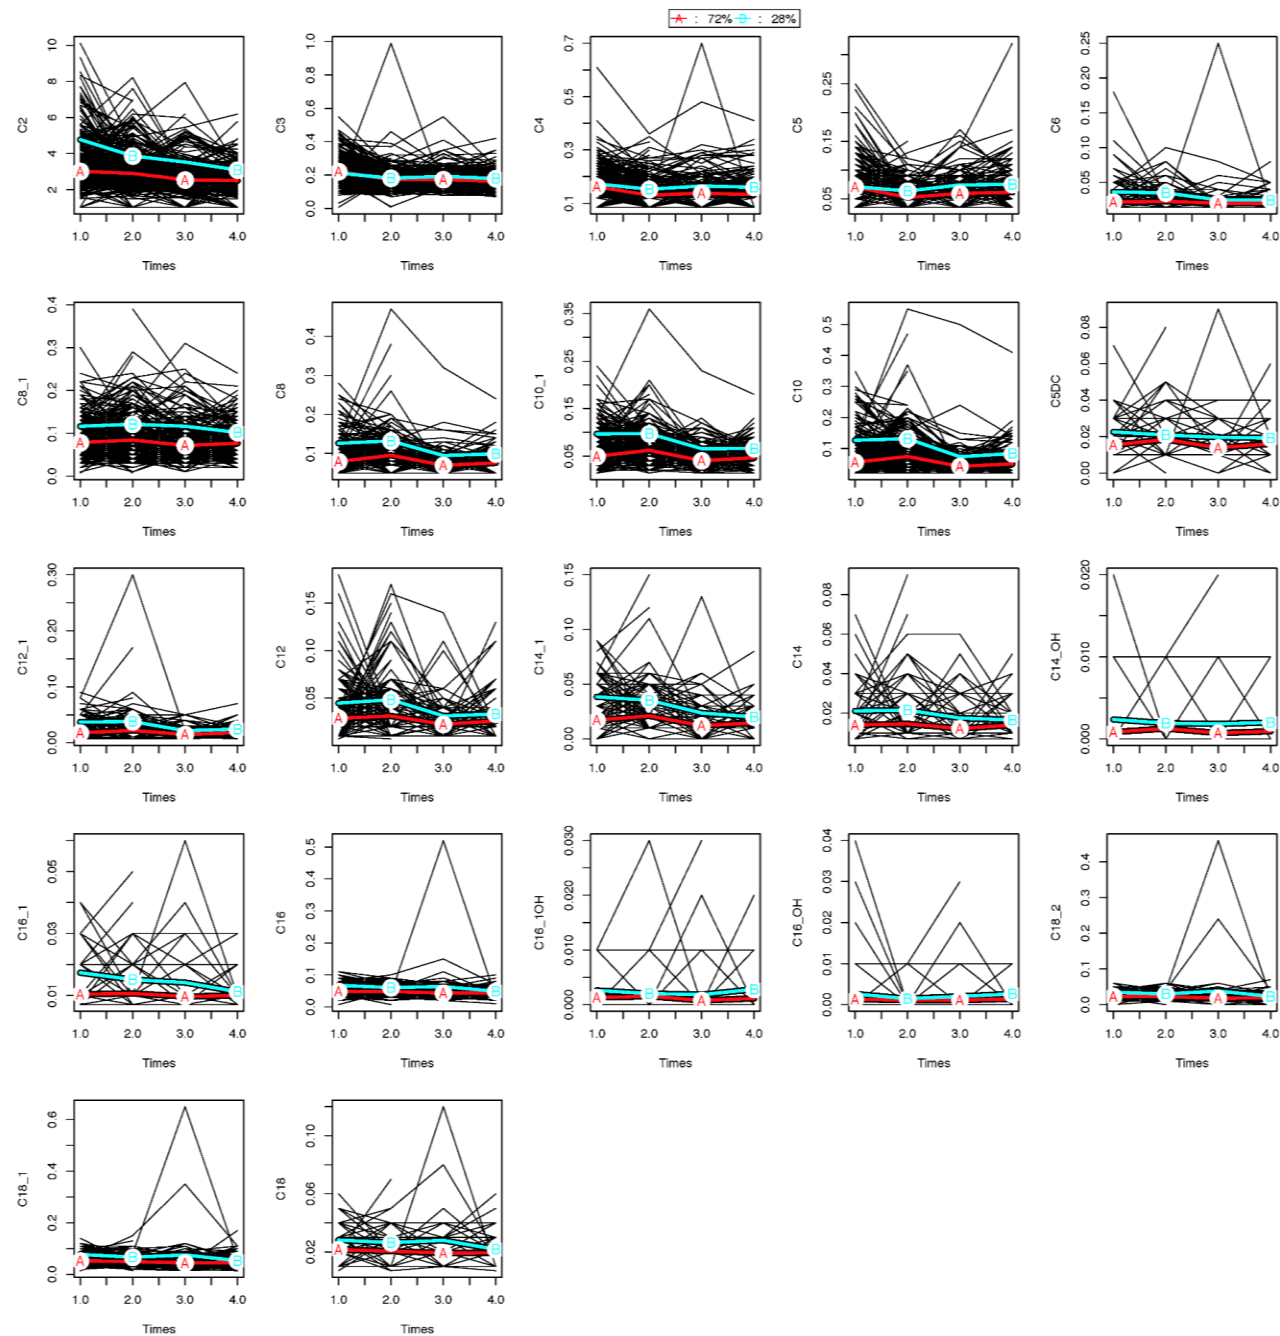

Supplementary Table S1. Acylcarnitine in association with neonatal birthweight, birthweight z score, length, sum of skinfolds and sum of body circumference <sup>a b c</sup>

| Maternal biomarker | Neonatal outcome, Adjusted $\beta$ (95% CI) |                      |                      |                      |                          |
|--------------------|---------------------------------------------|----------------------|----------------------|----------------------|--------------------------|
|                    | Birthweight, g                              | Birthweight, z score | Length, cm           | Sum of skinfolds, mm | Sum of circumference, cm |
| C2                 |                                             |                      |                      |                      |                          |
| 10–14 weeks        | -0.07 (-0.32, 0.18)                         | 0 (-0.14, 0.15)      | 0.01 (-0.19, 0.2)    | -0.01 (-0.18, 0.17)  | 0.03 (-0.12, 0.18)       |
| 15–26 weeks        | -0.19 (-0.42, 0.05)                         | -0.12 (-0.27, 0.03)  | -0.07 (-0.29, 0.16)  | 0.04 (-0.14, 0.22)   | -0.04 (-0.19, 0.11)      |
| 23–31 weeks        | -0.04 (-0.19, 0.12)                         | -0.01 (-0.19, 0.17)  | -0.06 (-0.2, 0.09)   | 0.01 (-0.19, 0.21)   | 0.02 (-0.16, 0.19)       |
| 33–39 weeks        | -0.04 (-0.21, 0.13)                         | -0.04 (-0.23, 0.15)  | -0.07 (-0.29, 0.14)  | -0.03 (-0.22, 0.15)  | 0 (-0.18, 0.18)          |
| C3                 |                                             |                      |                      |                      |                          |
| 10–14 weeks        | 0.08 (-0.07, 0.22)                          | 0.07 (-0.06, 0.19)   | 0.09 (-0.05, 0.23)   | 0.11 (-0.04, 0.25)   | 0.09 (-0.05, 0.24)       |
| 15–26 weeks        | -0.02 (-0.17, 0.13)                         | -0.03 (-0.15, 0.09)  | 0.04 (-0.1, 0.18)    | 0.21 (0.05, 0.37)    | 0.1 (-0.05, 0.25)        |
| 23–31 weeks        | 0 (-0.15, 0.15)                             | -0.01 (-0.17, 0.15)  | -0.05 (-0.21, 0.11)  | 0.12 (0, 0.25)       | 0.04 (-0.12, 0.21)       |
| 33–39 weeks        | -0.06 (-0.24, 0.13)                         | -0.1 (-0.28, 0.08)   | -0.11 (-0.3, 0.09)   | -0.07 (-0.26, 0.13)  | 0.03 (-0.18, 0.24)       |
| C4                 |                                             |                      |                      |                      |                          |
| 10–14 weeks        | 0.07 (-0.08, 0.22)                          | 0.01 (-0.13, 0.15)   | 0.03 (-0.12, 0.18)   | 0.12 (-0.06, 0.29)   | 0.06 (-0.1, 0.22)        |
| 15–26 weeks        | 0.03 (-0.14, 0.19)                          | -0.04 (-0.18, 0.1)   | 0.02 (-0.15, 0.18)   | 0.11 (-0.02, 0.25)   | 0.04 (-0.12, 0.19)       |
| 23–31 weeks        | -0.09 (-0.27, 0.09)                         | -0.16 (-0.36, 0.03)  | -0.31 (-0.56, -0.06) | -0.05 (-0.29, 0.19)  | -0.07 (-0.25, 0.12)      |
| 33–39 weeks        | -0.24 (-0.46, -0.02)                        | -0.26 (-0.46, -0.05) | -0.4 (-0.64, -0.16)  | -0.24 (-0.45, -0.02) | -0.12 (-0.39, 0.14)      |
| C5                 |                                             |                      |                      |                      |                          |
| 10–14 weeks        | 0.1 (-0.03, 0.24)                           | 0.07 (-0.04, 0.19)   | 0.06 (-0.08, 0.2)    | 0.04 (-0.11, 0.19)   | 0.06 (-0.09, 0.22)       |
| 15–26 weeks        | -0.02 (-0.19, 0.16)                         | 0 (-0.13, 0.13)      | -0.06 (-0.23, 0.11)  | 0.13 (0, 0.26)       | -0.03 (-0.18, 0.13)      |
| 23–31 weeks        | 0.01 (-0.14, 0.15)                          | -0.04 (-0.2, 0.11)   | -0.13 (-0.36, 0.09)  | -0.04 (-0.21, 0.13)  | 0.08 (-0.08, 0.23)       |
| 33–39 weeks        | -0.12 (-0.32, 0.08)                         | -0.11 (-0.35, 0.14)  | -0.11 (-0.43, 0.21)  | -0.02 (-0.29, 0.24)  | -0.01 (-0.21, 0.18)      |
| C6                 |                                             |                      |                      |                      |                          |
| 10–14 weeks        | 0.07 (-0.03, 0.18)                          | 0.05 (-0.07, 0.16)   | 0.02 (-0.11, 0.15)   | 0.16 (0.02, 0.29)    | 0 (-0.12, 0.13)          |
| 15–26 weeks        | -0.04 (-0.26, 0.17)                         | 0.08 (-0.06, 0.22)   | -0.06 (-0.24, 0.13)  | 0.14 (-0.01, 0.28)   | 0.1 (-0.03, 0.23)        |
| 23–31 weeks        | -0.07 (-0.12, -0.02)                        | -0.1 (-0.16, -0.04)  | -0.05 (-0.12, 0.01)  | -0.04 (-0.12, 0.04)  | -0.07 (-0.14, 0.01)      |
| 33–39 weeks        | -0.03 (-0.13, 0.07)                         | -0.04 (-0.13, 0.05)  | 0 (-0.11, 0.1)       | -0.14 (-0.26, -0.03) | -0.02 (-0.13, 0.09)      |
| C8:1               |                                             |                      |                      |                      |                          |
| 10–14 weeks        | -0.05 (-0.26, 0.16)                         | 0.03 (-0.11, 0.16)   | 0.04 (-0.16, 0.24)   | -0.1 (-0.28, 0.09)   | -0.08 (-0.27, 0.11)      |
| 15–26 weeks        | -0.11 (-0.32, 0.11)                         | -0.05 (-0.21, 0.11)  | 0.08 (-0.13, 0.29)   | 0.04 (-0.18, 0.25)   | -0.03 (-0.21, 0.15)      |
| 23–31 weeks        | 0.09 (-0.03, 0.2)                           | 0.06 (-0.1, 0.21)    | 0.03 (-0.12, 0.17)   | 0.08 (-0.04, 0.21)   | 0.12 (0.01, 0.24)        |
| 33–39 weeks        | 0.05 (-0.16, 0.26)                          | 0.04 (-0.16, 0.23)   | -0.04 (-0.24, 0.16)  | -0.06 (-0.23, 0.11)  | 0.03 (-0.19, 0.26)       |
| C8                 |                                             |                      |                      |                      |                          |
| 10–14 weeks        | 0.02 (-0.12, 0.15)                          | 0.02 (-0.09, 0.14)   | 0.01 (-0.14, 0.15)   | 0.12 (-0.03, 0.26)   | -0.05 (-0.18, 0.09)      |
| 15–26 weeks        | -0.07 (-0.23, 0.1)                          | 0.01 (-0.1, 0.12)    | -0.07 (-0.23, 0.1)   | 0.12 (-0.02, 0.25)   | 0.01 (-0.11, 0.13)       |
| 23–31 weeks        | 0.17 (-0.01, 0.35)                          | 0.22 (0.04, 0.39)    | 0.19 (0.04, 0.34)    | 0.27 (0.12, 0.42)    | 0.21 (0.02, 0.39)        |
| 33–39 weeks        | 0.08 (-0.07, 0.24)                          | 0.1 (-0.06, 0.25)    | 0.11 (-0.11, 0.33)   | 0.23 (0.05, 0.41)    | -0.04 (-0.22, 0.14)      |
| C10:1              |                                             |                      |                      |                      |                          |
| 10–14 weeks        | 0.02 (-0.15, 0.2)                           | 0.04 (-0.08, 0.16)   | 0.08 (-0.09, 0.25)   | 0.12 (-0.04, 0.28)   | -0.01 (-0.14, 0.13)      |
| 15–26 weeks        | -0.08 (-0.29, 0.12)                         | -0.03 (-0.16, 0.1)   | -0.09 (-0.28, 0.09)  | 0.12 (-0.06, 0.3)    | 0.03 (-0.09, 0.15)       |
| 23–31 weeks        | 0.08 (-0.08, 0.25)                          | 0.14 (-0.03, 0.32)   | 0.11 (-0.11, 0.32)   | 0.21 (0.05, 0.37)    | 0.12 (-0.06, 0.3)        |
| 33–39 weeks        | 0.13 (-0.02, 0.28)                          | 0.1 (-0.07, 0.27)    | 0.07 (-0.12, 0.26)   | 0.12 (-0.07, 0.3)    | 0.02 (-0.14, 0.19)       |
| C10                |                                             |                      |                      |                      |                          |
| 10–14 weeks        | 0.05 (-0.1, 0.19)                           | 0.03 (-0.09, 0.15)   | 0.05 (-0.11, 0.21)   | 0.15 (0, 0.29)       | -0.02 (-0.16, 0.12)      |
| 15–26 weeks        | -0.1 (-0.29, 0.09)                          | -0.04 (-0.16, 0.08)  | -0.1 (-0.27, 0.07)   | 0.1 (-0.05, 0.25)    | -0.02 (-0.14, 0.11)      |
| 23–31 weeks        | 0 (-0.12, 0.13)                             | 0.07 (-0.08, 0.21)   | 0.1 (-0.06, 0.25)    | 0.14 (0.02, 0.26)    | 0.04 (-0.1, 0.19)        |

|             |                      |                     |                      |                      |                     |
|-------------|----------------------|---------------------|----------------------|----------------------|---------------------|
| 33–39 weeks | -0.03 (-0.18, 0.13)  | -0.01 (-0.21, 0.19) | 0.08 (-0.12, 0.28)   | 0.08 (-0.12, 0.28)   | -0.07 (-0.31, 0.16) |
| C5:DC       |                      |                     |                      |                      |                     |
| 10–14 weeks | 0.01 (-0.13, 0.14)   | 0.02 (-0.08, 0.12)  | 0.05 (-0.08, 0.19)   | -0.01 (-0.16, 0.13)  | -0.01 (-0.15, 0.14) |
| 15–26 weeks | -0.12 (-0.36, 0.12)  | -0.06 (-0.18, 0.06) | -0.06 (-0.2, 0.09)   | -0.05 (-0.19, 0.09)  | 0.05 (-0.08, 0.18)  |
| 23–31 weeks | 0.06 (-0.16, 0.28)   | 0.06 (-0.17, 0.29)  | 0.05 (-0.19, 0.3)    | 0.12 (-0.1, 0.34)    | 0.18 (-0.07, 0.42)  |
| 33–39 weeks | 0.11 (-0.1, 0.32)    | 0.09 (-0.14, 0.32)  | 0.12 (-0.1, 0.34)    | 0.03 (-0.17, 0.24)   | 0.14 (-0.09, 0.36)  |
| C12:1       |                      |                     |                      |                      |                     |
| 10–14 weeks | -0.02 (-0.2, 0.17)   | 0.02 (-0.11, 0.15)  | 0.01 (-0.15, 0.18)   | 0.13 (-0.06, 0.33)   | 0 (-0.14, 0.13)     |
| 15–26 weeks | -0.15 (-0.38, 0.08)  | -0.07 (-0.17, 0.03) | -0.07 (-0.21, 0.06)  | 0.13 (-0.06, 0.31)   | -0.07 (-0.13, 0)    |
| 23–31 weeks | 0.08 (-0.11, 0.26)   | 0.17 (-0.01, 0.36)  | 0.12 (-0.06, 0.3)    | 0.16 (-0.02, 0.35)   | 0.11 (-0.08, 0.31)  |
| 33–39 weeks | 0.08 (-0.07, 0.23)   | 0.04 (-0.11, 0.2)   | 0.09 (-0.11, 0.29)   | 0.07 (-0.1, 0.24)    | 0 (-0.16, 0.16)     |
| C12         |                      |                     |                      |                      |                     |
| 10–14 weeks | 0.02 (-0.15, 0.18)   | 0.03 (-0.08, 0.14)  | 0.02 (-0.12, 0.16)   | 0.12 (-0.03, 0.26)   | 0.01 (-0.14, 0.15)  |
| 15–26 weeks | -0.23 (-0.46, -0.01) | -0.1 (-0.22, 0.01)  | -0.15 (-0.3, 0)      | -0.01 (-0.15, 0.13)  | -0.05 (-0.21, 0.11) |
| 23–31 weeks | 0.18 (-0.01, 0.37)   | 0.21 (-0.02, 0.44)  | 0.07 (-0.13, 0.28)   | -0.02 (-0.34, 0.3)   | 0.27 (0.11, 0.44)   |
| 33–39 weeks | 0.04 (-0.12, 0.21)   | 0.05 (-0.11, 0.2)   | 0.11 (-0.1, 0.33)    | 0.1 (-0.1, 0.3)      | -0.11 (-0.3, 0.07)  |
| C14:1       |                      |                     |                      |                      |                     |
| 10–14 weeks | 0.01 (-0.21, 0.22)   | 0.07 (-0.07, 0.2)   | 0.01 (-0.19, 0.21)   | 0.11 (-0.11, 0.32)   | 0.06 (-0.08, 0.2)   |
| 15–26 weeks | -0.25 (-0.38, -0.12) | -0.1 (-0.19, -0.02) | -0.12 (-0.22, -0.02) | 0.05 (-0.15, 0.24)   | -0.07 (-0.21, 0.08) |
| 23–31 weeks | 0.04 (-0.07, 0.14)   | 0.05 (-0.08, 0.18)  | -0.05 (-0.16, 0.07)  | -0.16 (-0.32, 0)     | 0.11 (0.02, 0.21)   |
| 33–39 weeks | 0.15 (0.01, 0.29)    | 0.14 (-0.01, 0.29)  | 0.16 (-0.02, 0.35)   | 0.06 (-0.13, 0.25)   | 0.15 (0, 0.31)      |
| C14         |                      |                     |                      |                      |                     |
| 10–14 weeks | 0.04 (-0.09, 0.16)   | 0.03 (-0.08, 0.15)  | 0.02 (-0.13, 0.18)   | 0.07 (-0.08, 0.23)   | 0 (-0.13, 0.14)     |
| 15–26 weeks | -0.24 (-0.45, -0.04) | -0.11 (-0.22, 0.01) | -0.13 (-0.26, 0)     | -0.06 (-0.21, 0.08)  | -0.07 (-0.22, 0.08) |
| 23–31 weeks | 0.18 (-0.01, 0.38)   | 0.2 (-0.02, 0.41)   | 0.07 (-0.14, 0.27)   | -0.06 (-0.36, 0.24)  | 0.25 (0.08, 0.42)   |
| 33–39 weeks | 0.03 (-0.18, 0.24)   | 0.05 (-0.15, 0.26)  | 0.08 (-0.21, 0.37)   | 0.2 (-0.01, 0.41)    | -0.06 (-0.26, 0.15) |
| C14_OH      |                      |                     |                      |                      |                     |
| 10–14 weeks | 0.08 (-0.04, 0.2)    | 0.05 (-0.08, 0.18)  | 0.12 (0.01, 0.23)    | 0.05 (-0.08, 0.18)   | 0.04 (-0.12, 0.19)  |
| 15–26 weeks | -0.04 (-0.27, 0.19)  | 0.05 (-0.1, 0.19)   | 0.02 (-0.17, 0.21)   | 0.02 (-0.16, 0.21)   | 0.05 (-0.11, 0.21)  |
| 23–31 weeks | 0.07 (-0.05, 0.19)   | 0 (-0.16, 0.15)     | 0.03 (-0.11, 0.16)   | -0.09 (-0.31, 0.13)  | 0.08 (-0.08, 0.23)  |
| 33–39 weeks | 0.18 (-0.02, 0.38)   | 0.19 (0, 0.38)      | 0.18 (0.01, 0.36)    | 0.09 (-0.08, 0.25)   | 0.18 (0, 0.36)      |
| C16_1       |                      |                     |                      |                      |                     |
| 10–14 weeks | 0.01 (-0.19, 0.21)   | 0.04 (-0.1, 0.18)   | -0.02 (-0.22, 0.17)  | 0.13 (-0.06, 0.31)   | -0.01 (-0.14, 0.13) |
| 15–26 weeks | -0.17 (-0.41, 0.06)  | -0.05 (-0.18, 0.09) | -0.07 (-0.26, 0.11)  | 0.09 (-0.09, 0.28)   | 0.03 (-0.09, 0.14)  |
| 23–31 weeks | 0.02 (-0.08, 0.12)   | 0.02 (-0.09, 0.13)  | 0.04 (-0.13, 0.2)    | -0.13 (-0.32, 0.06)  | 0.09 (-0.01, 0.2)   |
| 33–39 weeks | 0.07 (-0.08, 0.22)   | 0.04 (-0.14, 0.22)  | 0.1 (-0.1, 0.3)      | 0.04 (-0.18, 0.25)   | 0.04 (-0.14, 0.23)  |
| C16         |                      |                     |                      |                      |                     |
| 10–14 weeks | -0.06 (-0.24, 0.13)  | 0.02 (-0.1, 0.14)   | 0.01 (-0.19, 0.21)   | 0.05 (-0.12, 0.23)   | -0.03 (-0.16, 0.09) |
| 15–26 weeks | -0.13 (-0.32, 0.06)  | -0.07 (-0.19, 0.06) | -0.12 (-0.29, 0.04)  | 0.03 (-0.13, 0.2)    | -0.04 (-0.16, 0.08) |
| 23–31 weeks | -0.02 (-0.09, 0.04)  | -0.03 (-0.09, 0.03) | -0.06 (-0.13, 0)     | -0.18 (-0.26, -0.09) | 0.05 (-0.01, 0.11)  |
| 33–39 weeks | -0.19 (-0.35, -0.02) | -0.11 (-0.28, 0.06) | -0.11 (-0.32, 0.1)   | -0.07 (-0.23, 0.1)   | -0.17 (-0.35, 0)    |
| C16_1OH     |                      |                     |                      |                      |                     |
| 10–14 weeks | -0.1 (-0.32, 0.11)   | -0.02 (-0.17, 0.13) | -0.11 (-0.28, 0.07)  | -0.03 (-0.18, 0.11)  | 0.11 (-0.04, 0.26)  |
| 15–26 weeks | -0.05 (-0.3, 0.2)    | 0.06 (-0.08, 0.21)  | -0.02 (-0.21, 0.18)  | 0.07 (-0.08, 0.23)   | 0.07 (-0.04, 0.19)  |
| 23–31 weeks | -0.04 (-0.22, 0.14)  | -0.07 (-0.27, 0.13) | -0.18 (-0.33, -0.03) | -0.25 (-0.46, -0.03) | -0.04 (-0.28, 0.2)  |
| 33–39 weeks | 0.11 (-0.06, 0.28)   | 0.06 (-0.11, 0.23)  | 0.17 (0.02, 0.32)    | 0.16 (-0.09, 0.41)   | 0.02 (-0.19, 0.22)  |
| C16_OH      |                      |                     |                      |                      |                     |
| 10–14 weeks | -0.04 (-0.25, 0.17)  | 0.07 (-0.06, 0.19)  | -0.01 (-0.15, 0.12)  | 0.07 (-0.06, 0.2)    | 0.05 (-0.1, 0.2)    |

|             |                     |                     |                      |                      |                     |
|-------------|---------------------|---------------------|----------------------|----------------------|---------------------|
| 15–26 weeks | -0.17 (-0.42, 0.08) | -0.03 (-0.18, 0.13) | -0.15 (-0.31, 0.02)  | -0.08 (-0.16, 0.01)  | 0.03 (-0.1, 0.15)   |
| 23–31 weeks | 0.11 (-0.06, 0.28)  | 0.13 (-0.04, 0.3)   | 0 (-0.17, 0.17)      | -0.01 (-0.13, 0.11)  | 0.12 (-0.13, 0.38)  |
| 33–39 weeks | 0.27 (0.1, 0.44)    | 0.26 (0.08, 0.43)   | 0.22 (0.08, 0.37)    | 0.3 (0.11, 0.49)     | 0.22 (0.03, 0.42)   |
| C18:2       |                     |                     |                      |                      |                     |
| 10–14 weeks | -0.04 (-0.19, 0.1)  | 0.02 (-0.1, 0.15)   | -0.01 (-0.2, 0.18)   | 0.06 (-0.11, 0.22)   | -0.02 (-0.16, 0.12) |
| 15–26 weeks | -0.13 (-0.33, 0.07) | -0.08 (-0.21, 0.05) | -0.11 (-0.27, 0.05)  | 0.04 (-0.13, 0.21)   | 0.02 (-0.11, 0.14)  |
| 23–31 weeks | -0.02 (-0.08, 0.04) | -0.02 (-0.08, 0.03) | -0.09 (-0.16, -0.01) | -0.21 (-0.28, -0.13) | 0.07 (0.02, 0.12)   |
| 33–39 weeks | -0.02 (-0.19, 0.16) | 0.02 (-0.17, 0.2)   | 0.1 (-0.1, 0.29)     | -0.01 (-0.2, 0.17)   | -0.02 (-0.22, 0.18) |
| C18:1       |                     |                     |                      |                      |                     |
| 10–14 weeks | 0.05 (-0.12, 0.21)  | 0.08 (-0.06, 0.21)  | 0.11 (-0.09, 0.3)    | 0.06 (-0.1, 0.22)    | 0.01 (-0.12, 0.15)  |
| 15–26 weeks | -0.08 (-0.28, 0.13) | 0.02 (-0.12, 0.15)  | -0.03 (-0.2, 0.15)   | -0.02 (-0.2, 0.16)   | 0.01 (-0.12, 0.14)  |
| 23–31 weeks | -0.01 (-0.07, 0.05) | -0.02 (-0.08, 0.05) | -0.05 (-0.12, 0.03)  | -0.19 (-0.28, -0.11) | 0.07 (0, 0.13)      |
| 33–39 weeks | 0.04 (-0.14, 0.21)  | 0.04 (-0.12, 0.2)   | 0.19 (0.02, 0.36)    | 0.01 (-0.17, 0.18)   | 0.04 (-0.14, 0.23)  |
| C18         |                     |                     |                      |                      |                     |
| 10–14 weeks | -0.01 (-0.14, 0.11) | -0.03 (-0.15, 0.09) | 0 (-0.14, 0.14)      | 0.01 (-0.12, 0.13)   | -0.08 (-0.22, 0.07) |
| 15–26 weeks | 0 (-0.15, 0.16)     | 0.08 (-0.05, 0.22)  | -0.01 (-0.16, 0.14)  | 0.07 (-0.07, 0.22)   | 0.12 (-0.02, 0.27)  |
| 23–31 weeks | 0 (-0.1, 0.1)       | 0.02 (-0.09, 0.12)  | -0.02 (-0.14, 0.1)   | -0.12 (-0.32, 0.07)  | 0.1 (-0.01, 0.21)   |
| 33–39 weeks | 0.11 (-0.07, 0.3)   | 0.14 (-0.03, 0.3)   | 0.13 (-0.07, 0.34)   | 0.13 (-0.04, 0.31)   | 0.06 (-0.15, 0.27)  |

<sup>a</sup> Adjusted for maternal age (continuous), race/ethnicity (non-Hispanic white, non-Hispanic black, Hispanic, Asian), education (high school or less, some college/associate degree, 4-year college degree or higher), nulliparity (yes/no), prepregnancy body mass index (continuous), gestational age at blood collection (continuous); <sup>b</sup> The coefficient and 95% CI are standardized estimates, representing outcome change per one standard deviation increase in acylcarnitines

Supplementary Table S2: Joint trajectory of acylcarnitines across gestation and the association with neonatal birthweight, birthweight z score, length, sum of skinfolds, and sum of body circumferences

| Maternal biomarker | Neonatal outcome, Adjusted $\beta$ (95% CI) |                      |                    |                      |                          |
|--------------------|---------------------------------------------|----------------------|--------------------|----------------------|--------------------------|
|                    | Birthweight, g                              | Birthweight, z-score | Length, cm         | Sum of skinfolds, mm | Sum of circumference, cm |
| Trajectory         |                                             |                      |                    |                      |                          |
| Group 2            | 1340 (-1.64, 269)                           | 0.19 (-0.06, 0.44)   | 0.52 (-0.55, 1.58) | 0.72 (-1.48, 2.91)   | 1.82 (-0.92, 4.57)       |
| Group 1            | 0.0 (ref)                                   | 0.0 (ref)            | 0.0 (ref)          | 0.0 (ref)            | 0.0 (ref)                |
